# Supplementary material for: Simultaneous study of subcellular exocytosis with individually addressable multiple microelectrodes
Source: Royal Society of Chemistry journal article supplement (doi:10.1039/c4an00058g), 2014-01-01
Supplement: c4an00058g1.pdf [file c4an00058g1.pdf]

ARTICLE

## Simultaneous Study of Subcellular Exocytosis with Individually Addressable Multiple Microelectrodes

Cite this: DOI: 10.1039/x0xx00000x

Jun Wang,<sup>a,b</sup> and Andrew G. Ewing<sup>a,b,\*</sup>

Received 00th January 2012,  
Accepted 00th January 2012

DOI: 10.1039/x0xx00000x

www.rsc.org/

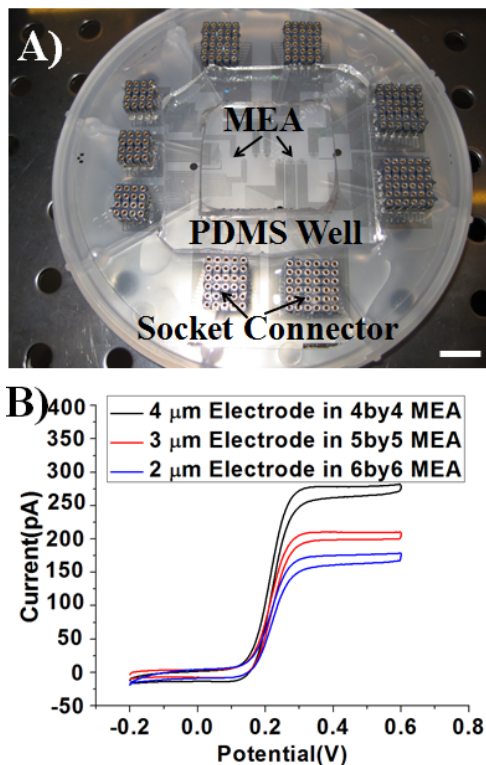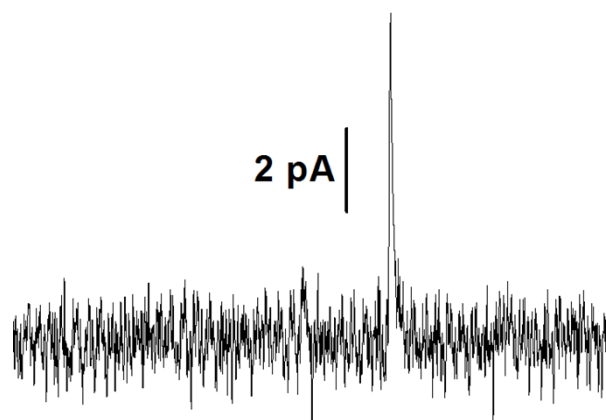

**Fig. S1.** A) Optical photo of the whole device with nine MEAs and nine socket connectors and one PDMS well for cell culture (scale bar: 10 mm); B,) Cyclic voltammetry for electrochemical characterization of 4  $\mu\text{m}$ , 3  $\mu\text{m}$  and 2  $\mu\text{m}$  microelectrodes in three kinds of MEAs (scan rate: 20 mV/s) obtained in 1 mM FcMeOH in PBS buffer).

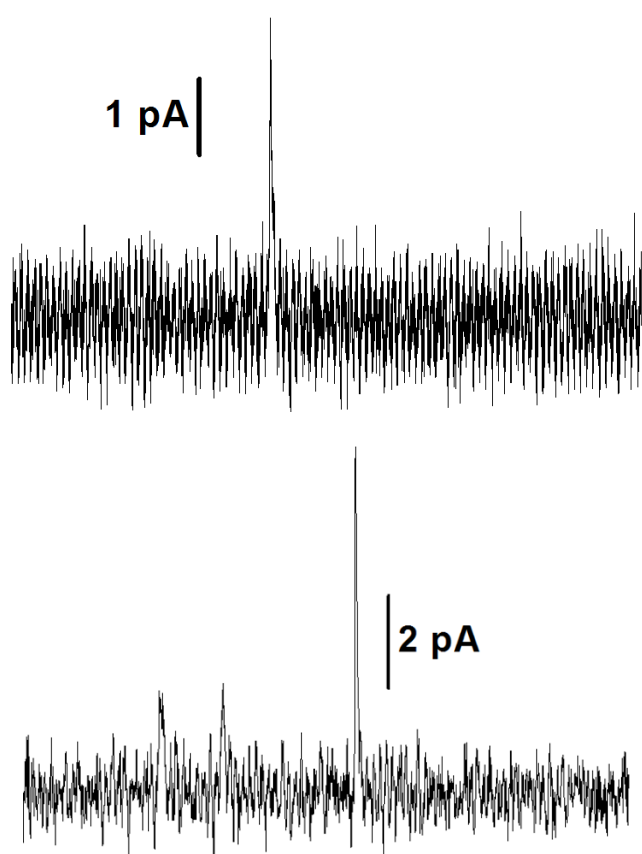

Fig. S2. Three 1-s time periods showing exocytotic responses at MEAs at a PC12 cell after potassium stimulation. The noise level is in the 1-2 pA range.

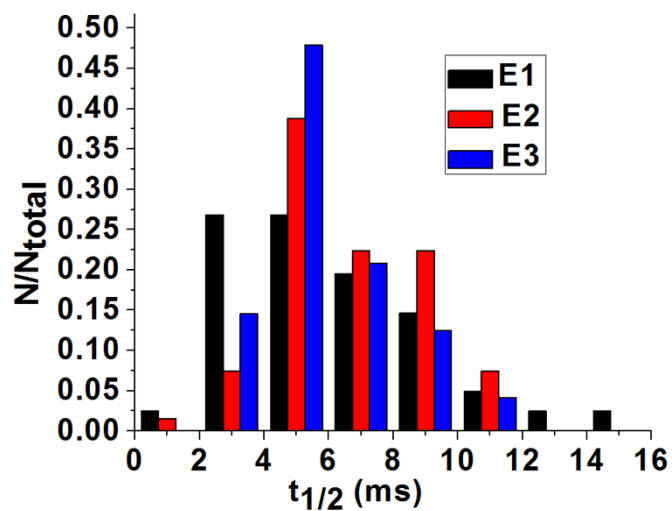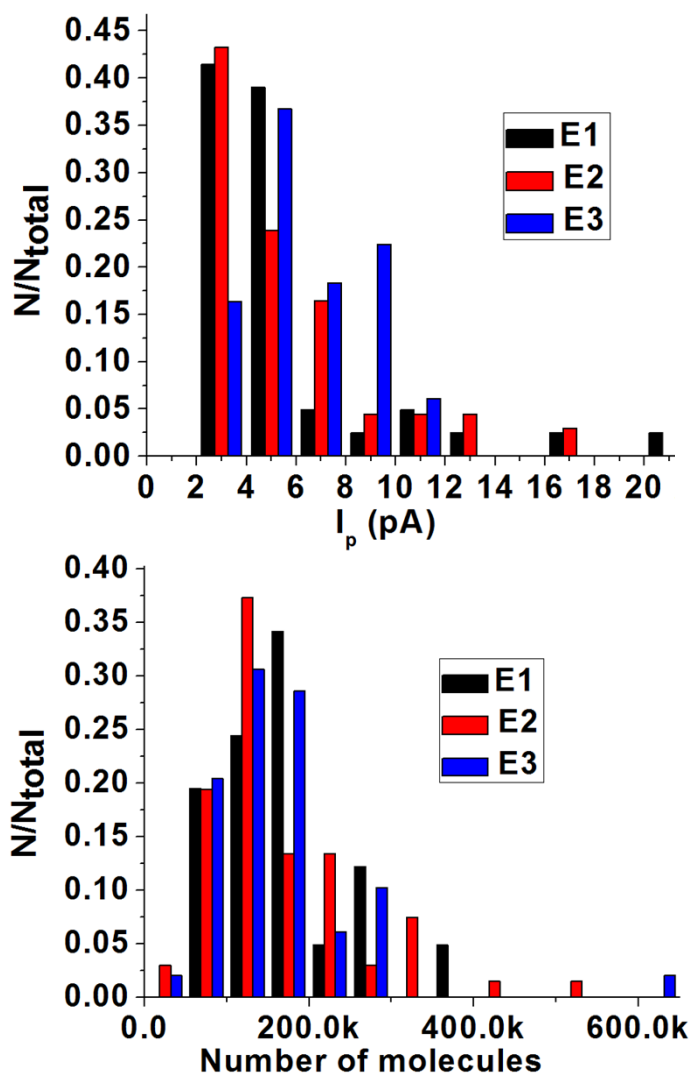

Fig. S3. Frequency histograms for the spike half-width ( $t_{1/2}$ ), spike peak current ( $I_p$ ), and number of released dopamine molecules for different electrodes, E1-E3, at a 4 by 4 MEA. The data are processed from the traces presented in Figure 2C.

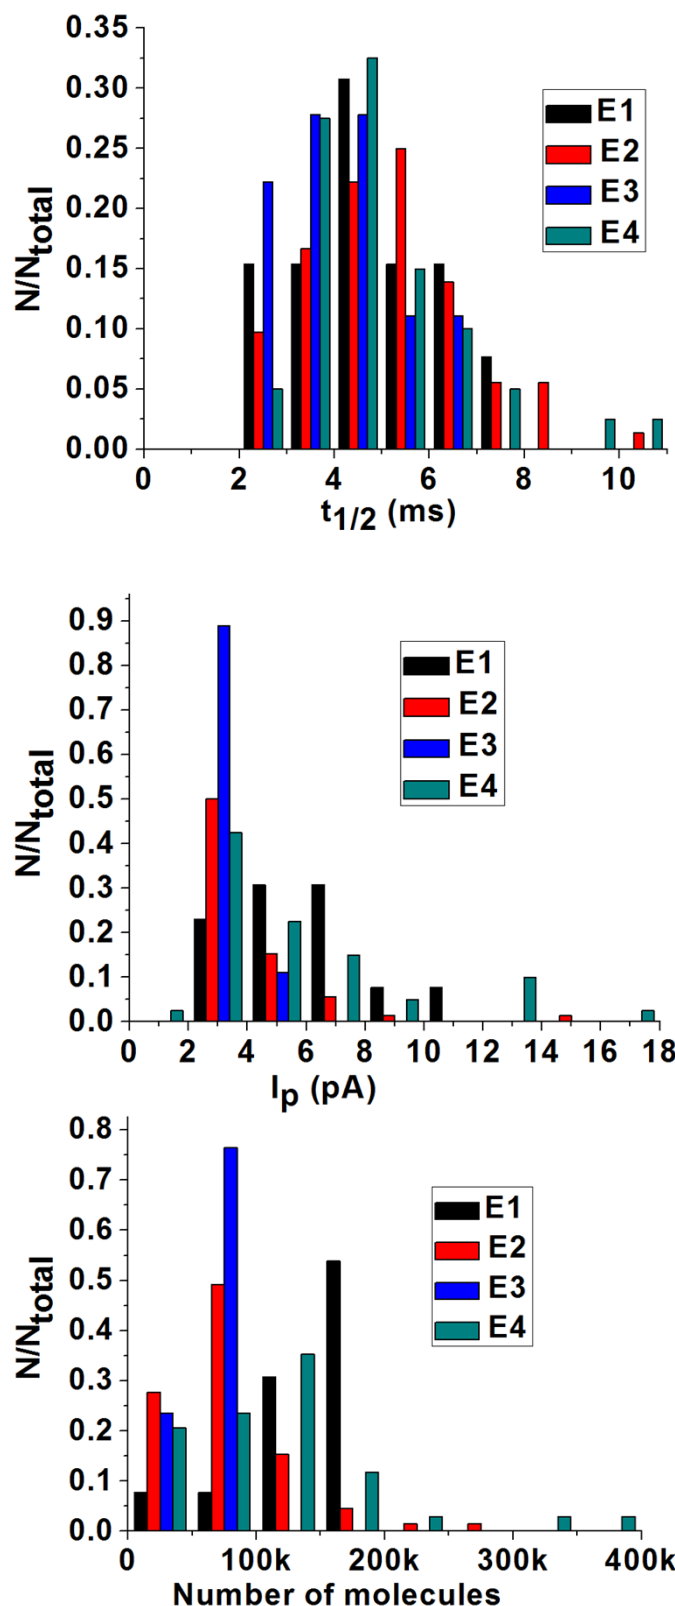

Fig. S4. Frequency histograms for the spike half-width ( $t_{1/2}$ ), spike peak current ( $I_p$ ), and number of released dopamine molecules for different electrodes, E1-E4, in a 5 by 5 MEA. The data are processed from the traces presented in Figure 3C.

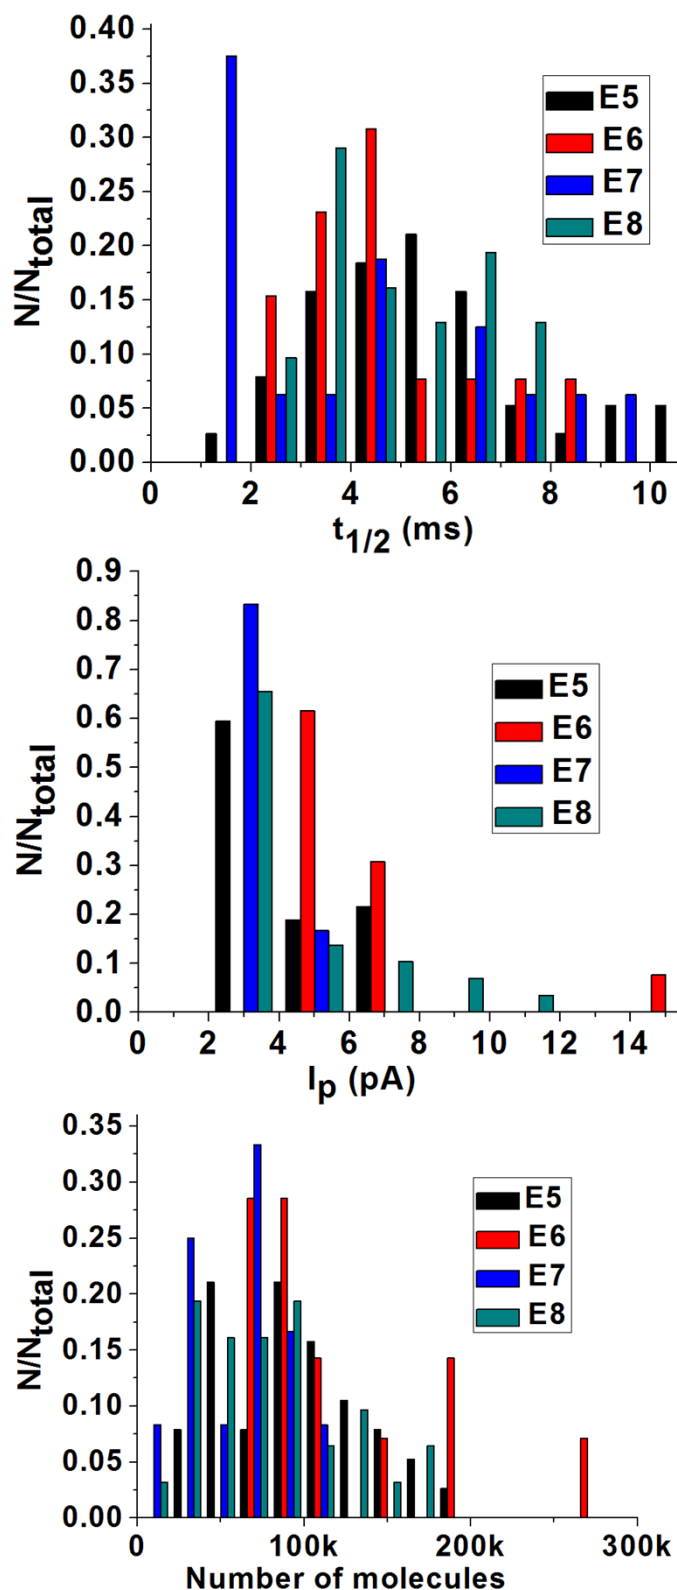

Fig. S5. Frequency histograms for the spike half-width ( $t_{1/2}$ ), spike peak current ( $I_p$ ) and number of released dopamine molecules for different electrodes, E5-E8, in a 4 by 4 MEA. The data are processed from the traces presented in Figure 4D.

## Notes and references

<sup>a</sup> *Department of Chemistry and Molecular Biology, University of Gothenburg, Sweden*

<sup>b</sup> *Department of Chemical and Biological Engineering, Chalmers University of Technology, Sweden*
